# Supplementary material for: Molecular Detection of Cryptosporidium cuniculus in Rabbits (Oryctolagus cuniculus) from Tenerife, Canary Islands, Spain
Source: MDPI journal article supplement (doi:10.3390/vetsci9020091), 2022-02-18
Supplement: s1 [file s1]

**Table S1.****Table S1.** *Cryptosporidium cuniculus* subtypes reported worldwide.

| Subtypes | Host                              | Country      | GenBank Accession Number | Reference |
|----------|-----------------------------------|--------------|--------------------------|-----------|
|          | Human                             | UK           | GU971640.1               | [48]      |
| VaA9     | River water and Riverbed Sediment | South Africa | -                        | [42]      |
| VaA11    | Riverbed Sediment                 | South Africa | -                        | [42]      |
|          | Treated drinking water            | UK           | FJ262730.1               | [21]      |
|          | Rabbit                            | UK           | FJ262731.1               | [21]      |
| VaA18    | Human                             | UK           | FJ262732.1               | [21]      |
|          | Human                             | UK           | GU971636.1               | [48]      |
|          | River water and Riverbed Sediment | South Africa | -                        | [42]      |
|          | Human                             | UK           | GU971642.1               | [48]      |
| VaA19    | Human                             | Sweden       | KU852733                 | [58]      |
|          | River water and Riverbed Sediment | South Africa | -                        | [42]      |
| VaA21    | Human                             | UK           | GU971634.1               | [48]      |
|          | River water and Riverbed Sediment | South Africa | -                        | [42]      |
| VaA22    | Human                             | UK           | EU437420.1               | [21,47]   |
|          | Human                             | UK           | GU971641.1               | [48]      |
| VaA23    | Human                             | UK           | GU971650.1               | [48]      |
|          | Riverbed Sediment                 | South Africa | -                        | [42]      |
| VaA31    | Wastewater                        | China        | -                        | [34]      |
|          | Rabbit                            | China        | KC157565.1               | [15]      |
|          | River water and Riverbed Sediment | South Africa | -                        | [42]      |
| Va       | Catchment water                   | Australia    | -                        | [41]      |
| Vb       | Catchment water                   | Australia    | -                        | [41]      |
| VbA11    | Human                             | UK           | GU971637.1               | [48]      |

|         |                   |                |                                  |         |
|---------|-------------------|----------------|----------------------------------|---------|
| VbA13   | Human             | New Zealand    | MT265698.1                       | [55]    |
| VbA15   | Human             | New Zealand    | MT265699.1                       | [55]    |
| VbA17   | Human             | New Zealand    | MT265700.1                       | [55]    |
|         | Human             | New Zealand    | MT265701.1                       | [55]    |
| VbA18   | Rabbit            | Australia      | MG516798.1                       | [26]    |
| VbA19   | Rabbit            | Czech Republic | FJ262733.1                       | [21,19] |
|         | Rabbit            | Egypt          | MT742540.1                       | [29]    |
| VbA20   | River             | China          | -                                | [40]    |
| VbA20R2 | Human             | Sweden         | KU852735                         | [58]    |
| VbA21   | Rabbit            | China          | HQ397717.1                       | [14]    |
|         | Rabbit            | Brazil         | KT948753.1                       | [28]    |
|         | Riverbed Sediment | South Africa   | -                                | [42]    |
| VbA22   | Human             | UK             | GU971644.1                       | [48]    |
|         | Human             | New Zealand    | KY123918.1                       | [54]    |
| VbA22R4 | Rabbit            | Australia      | KC283002.1                       | [23]    |
| VbA23   | Rabbit            | Australia      | KX375350.1                       | [25]    |
|         | Rabbit            | Australia      | MG516796.1                       | [26]    |
|         | Human             | New Zealand    | MT265702.1                       | [55]    |
|         | Human             | New Zealand    | MT265703.1                       | [55]    |
| VbA23R3 | Rabbit            | Australia      | HM852432.1                       | [22,23] |
| VbA24   | Rabbit            | Poland         | KF924253.1                       | [27]    |
|         | Rabbit            | Australia      | KU531704.1                       | [24]    |
|         | Rabbit            | China          | 100% homology with<br>KF924253.1 | [17]    |
|         | Human             | New Zealand    | MT265704.1                       | [55]    |
|         | Human             | New Zealand    | MT265705.1                       | [55]    |

|         |                                   |              |            |               |
|---------|-----------------------------------|--------------|------------|---------------|
|         | Human                             | New Zealand  | MT265706.1 | [55]          |
|         | Riverbed Sediment                 | South Africa | -          | [42]          |
|         | Rabbit                            | China        | MZ460994.1 | [18]          |
| VbA24R3 | Rabbit                            | Australia    | KC283005.1 | [23]          |
| VbA25   | Human                             | UK           | GU971647.1 | [48]          |
|         | Human                             | Australia    | KM366139.1 | [31]          |
|         | Rabbit                            | Australia    | KU531702.1 | [24]          |
|         | Rabbit                            | Australia    | KU531703.1 | [24]          |
|         | Human                             | New Zealand  | KY123919.1 | [54]          |
|         | Alpaca                            | Australia    | MH346122.1 | [32]          |
|         | Rabbit                            | Australia    | MG516794.1 | [26]          |
|         | Human                             | New Zealand  | MT265694.1 | [55]          |
|         | Human                             | New Zealand  | MT265695.1 | [55]          |
|         | River water and Riverbed Sediment | South Africa | -          | [42]          |
| VbA25R3 | Human                             | Spain        | KU852731   | [58]          |
| VbA25R4 | Rabbit                            | Australia    | KC283003.1 | [23]          |
| VbA26   | Human                             | UK           | GU971638.1 | [48]          |
|         | Kangaroo                          | Australia    | KM366140.1 | [31]          |
|         | Kangaroo                          | Australia    | KU531700.1 | [24]          |
|         | Rabbit                            | Australia    | KU531701.1 | [24]          |
|         | Rabbit                            | Australia    | KU531705.1 | [24]          |
|         | Rabbit                            | Australia    | MG516797.1 | [26]          |
|         | Human                             | New Zealand  | MT265707.1 | [55]          |
|         | River water and Riverbed Sediment | South Africa | -          | [42]          |
| VbA26R3 | Rabbit                            | Spain        | Acc Number | Present study |

|         |                                      |              |                                  |         |
|---------|--------------------------------------|--------------|----------------------------------|---------|
| VbA26R4 | Rabbit                               | Australia    | HM852433.1                       | [22]    |
|         | Rabbit                               | Australia    | KC283004.1                       | [23]    |
| VbA27   | Human                                | New Zealand  | KY123920.1                       | [54]    |
|         | Human                                | New Zealand  | MT265696.1                       | [55]    |
|         | Human                                | New Zealand  | MT265697.1                       | [55]    |
| VbA28   | Human                                | UK           | GU971631.1                       | [48]    |
|         | Rabbit                               | China        | 100% homology with<br>GU971631.1 | [16]    |
|         | Rabbit                               | Australia    | MG516795.1                       | [26]    |
|         | Human                                | New Zealand  | MT265708.1                       | [55]    |
|         | Riverbed Sediment                    | South Africa | -                                | [42]    |
| VbA29   | Rabbit                               | China        | FJ262734.1                       | [12,21] |
|         | Rabbit                               | China        | GU097639.1                       | [13]    |
|         | Rabbit                               | China        | GU097640.1                       | [13]    |
|         | Rabbit                               | China        | GU097642.1                       | [13]    |
|         | Human                                | UK           | GU971633.1                       | [48]    |
|         | Human                                | UK           | GU971643.1                       | [48]    |
|         | Rabbit                               | China        | 100% homology with<br>GU971633.1 | [16]    |
|         | Rabbit                               | Australia    | MG516793.1                       | [26]    |
|         | Riverbed Sediment                    | South Africa | -                                | [42]    |
|         | Rabbit                               | China        | MZ460993.1                       | []      |
|         | Rabbit                               | China        | MZ460995.1                       | []      |
| VbA29R4 | Human                                | Sweden       | KU852734.1                       | [58]    |
| VbA30   | River water and Riverbed<br>Sediment | South Africa | -                                | [42]    |
| VbA31   | Rabbit                               | China        | MZ460998.1                       | [18]    |

|         |                                      |              |                                  |      |
|---------|--------------------------------------|--------------|----------------------------------|------|
|         | Rabbit                               | China        | MZ460996.1                       | [18] |
| VbA31R4 | Human                                | Greece       | KU852732.1                       | [58] |
|         | Human                                | UK           | GU971646.1                       | [48] |
|         | Rabbit                               | China        | HQ397718.1                       | [14] |
| VbA32   | Rabbit                               | China        | 100% homology with<br>GU971646.1 | [16] |
|         | Riverbed Sediment                    | South Africa | -                                | [42] |
|         | Human                                | UK           | GU971635.1                       | [48] |
| VbA33   | Rabbit                               | Egypt        | MT328207.1                       | [29] |
|         | River water and Riverbed<br>Sediment | South Africa | -                                | [42] |
|         | Rabbit                               | China        | MZ460997.1                       | [18] |
|         | Human                                | UK           | GU971645.1                       | [48] |
| VbA34   | Human                                | Spain        | KU129016.1                       | [59] |
|         | River water and Riverbed<br>Sediment | South Africa | -                                | [42] |
| VbA35   | Rabbit                               | China        | GU097647.1                       | [13] |
|         | Human                                | UK           | GU971648.1                       | [48] |
| VbA36   | Rabbit                               | China        | GU097641.1                       | [13] |
|         | Human                                | UK           | GU971639.1                       | [48] |
| VbA37   | River water and Riverbed<br>Sediment | South Africa | -                                | [42] |
| VbA38   | Human                                | Canada       | -                                | [57] |
